# Supplementary material
Source: Research Square preprint supplement (doi:10.21203/rs.3.rs-9753063/v1)
Supplement: Supplementary file 1 [file 0408d2d054c4520b17dbfd40.docx]

**Supplementary Figures**


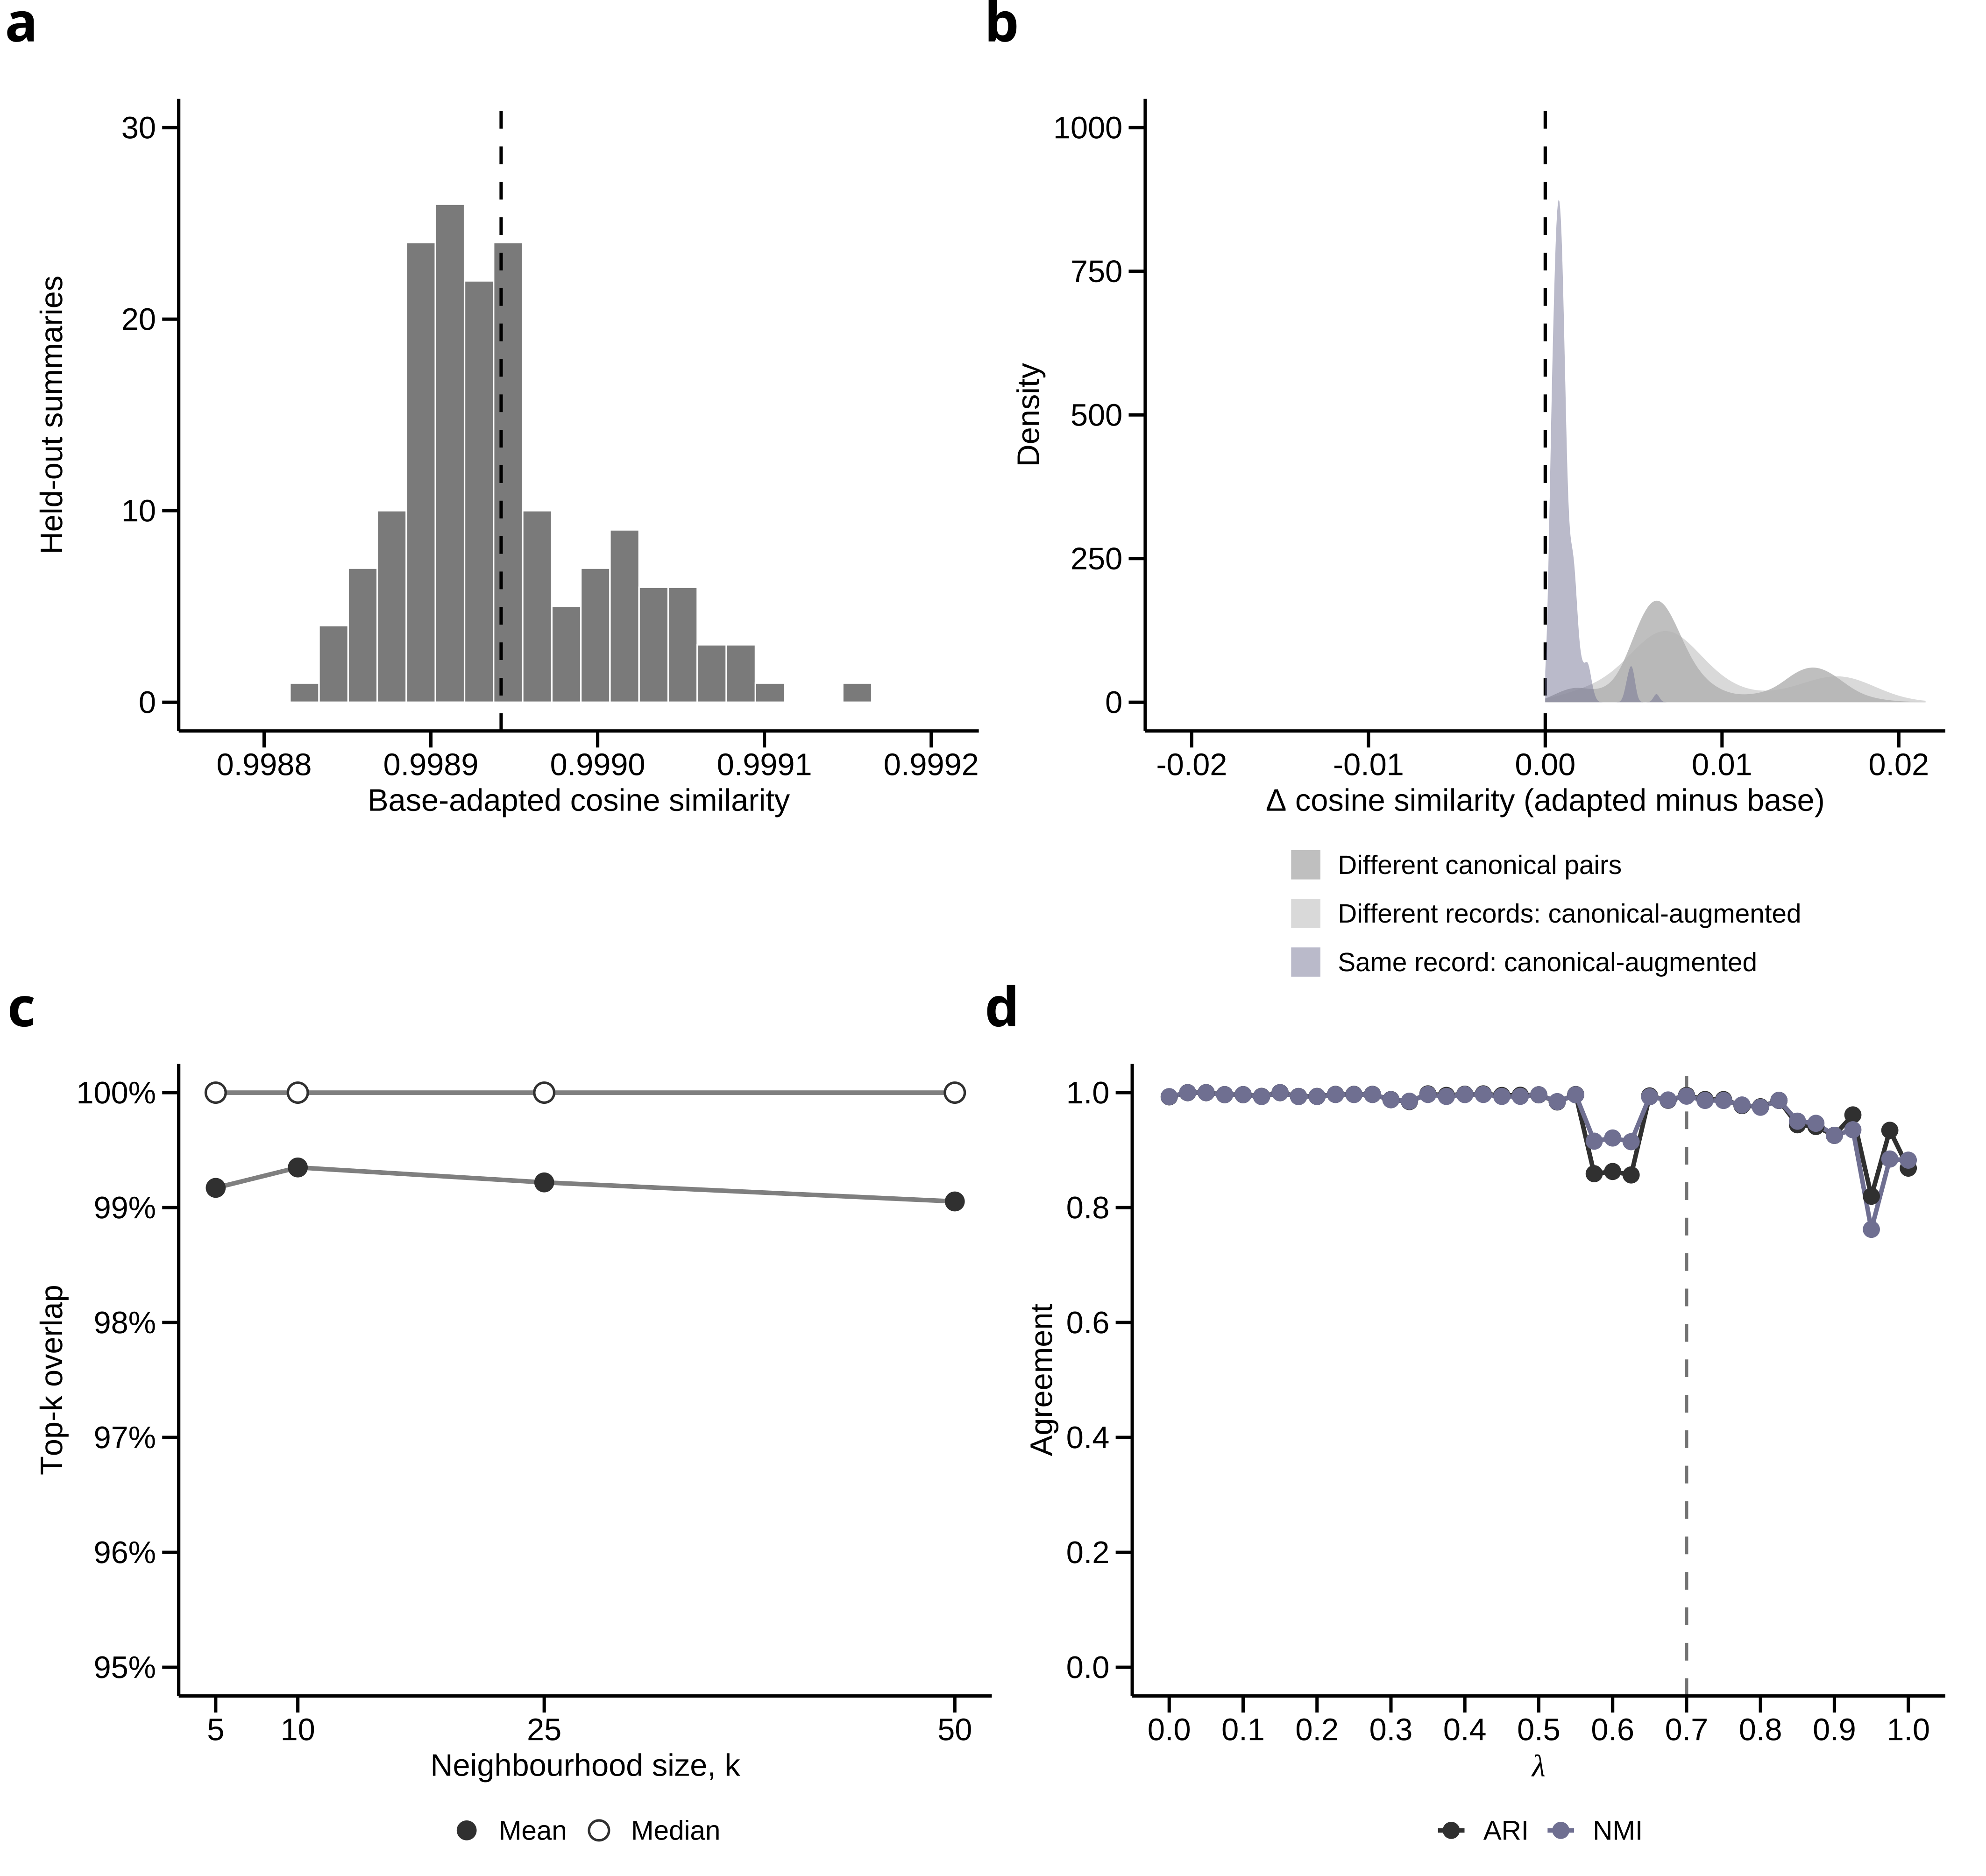


**Supplementary Figure 1. Encoder adaptation diagnostics.**
**a,** Base-versus-adapted cosine similarity for held-out canonical ACHD summaries. Mean similarity was 0.99894, with SD 0.00006, median 0.99893 and minimum 0.99883, indicating minimal embedding drift after schema adaptation. **b,** Change in pairwise cosine similarity after adaptation, calculated as adapted minus base similarity. Pairwise structure was preserved across held-out summaries, with Pearson r = 0.99992, Spearman ρ = 0.99986 and ΔAUROC = 0.00014 [−0.00018, 0.00054]. **c,** Nearest-neighbour preservation between base and adapted embedding spaces. Filled points show mean top-k overlap and open points show median overlap for k = 5, 10, 25 and 50; median overlap was 100% for all k. **d,** Base-versus-adapted clustering agreement across the λ sweep, measured using ARI and NMI. The dashed line marks the selected operating point, λ = 0.70, where agreement remained high (ARI = 0.995; NMI = 0.994). Together, these diagnostics show that schema adaptation preserved embedding geometry, local neighbourhood structure and clustering behaviour.


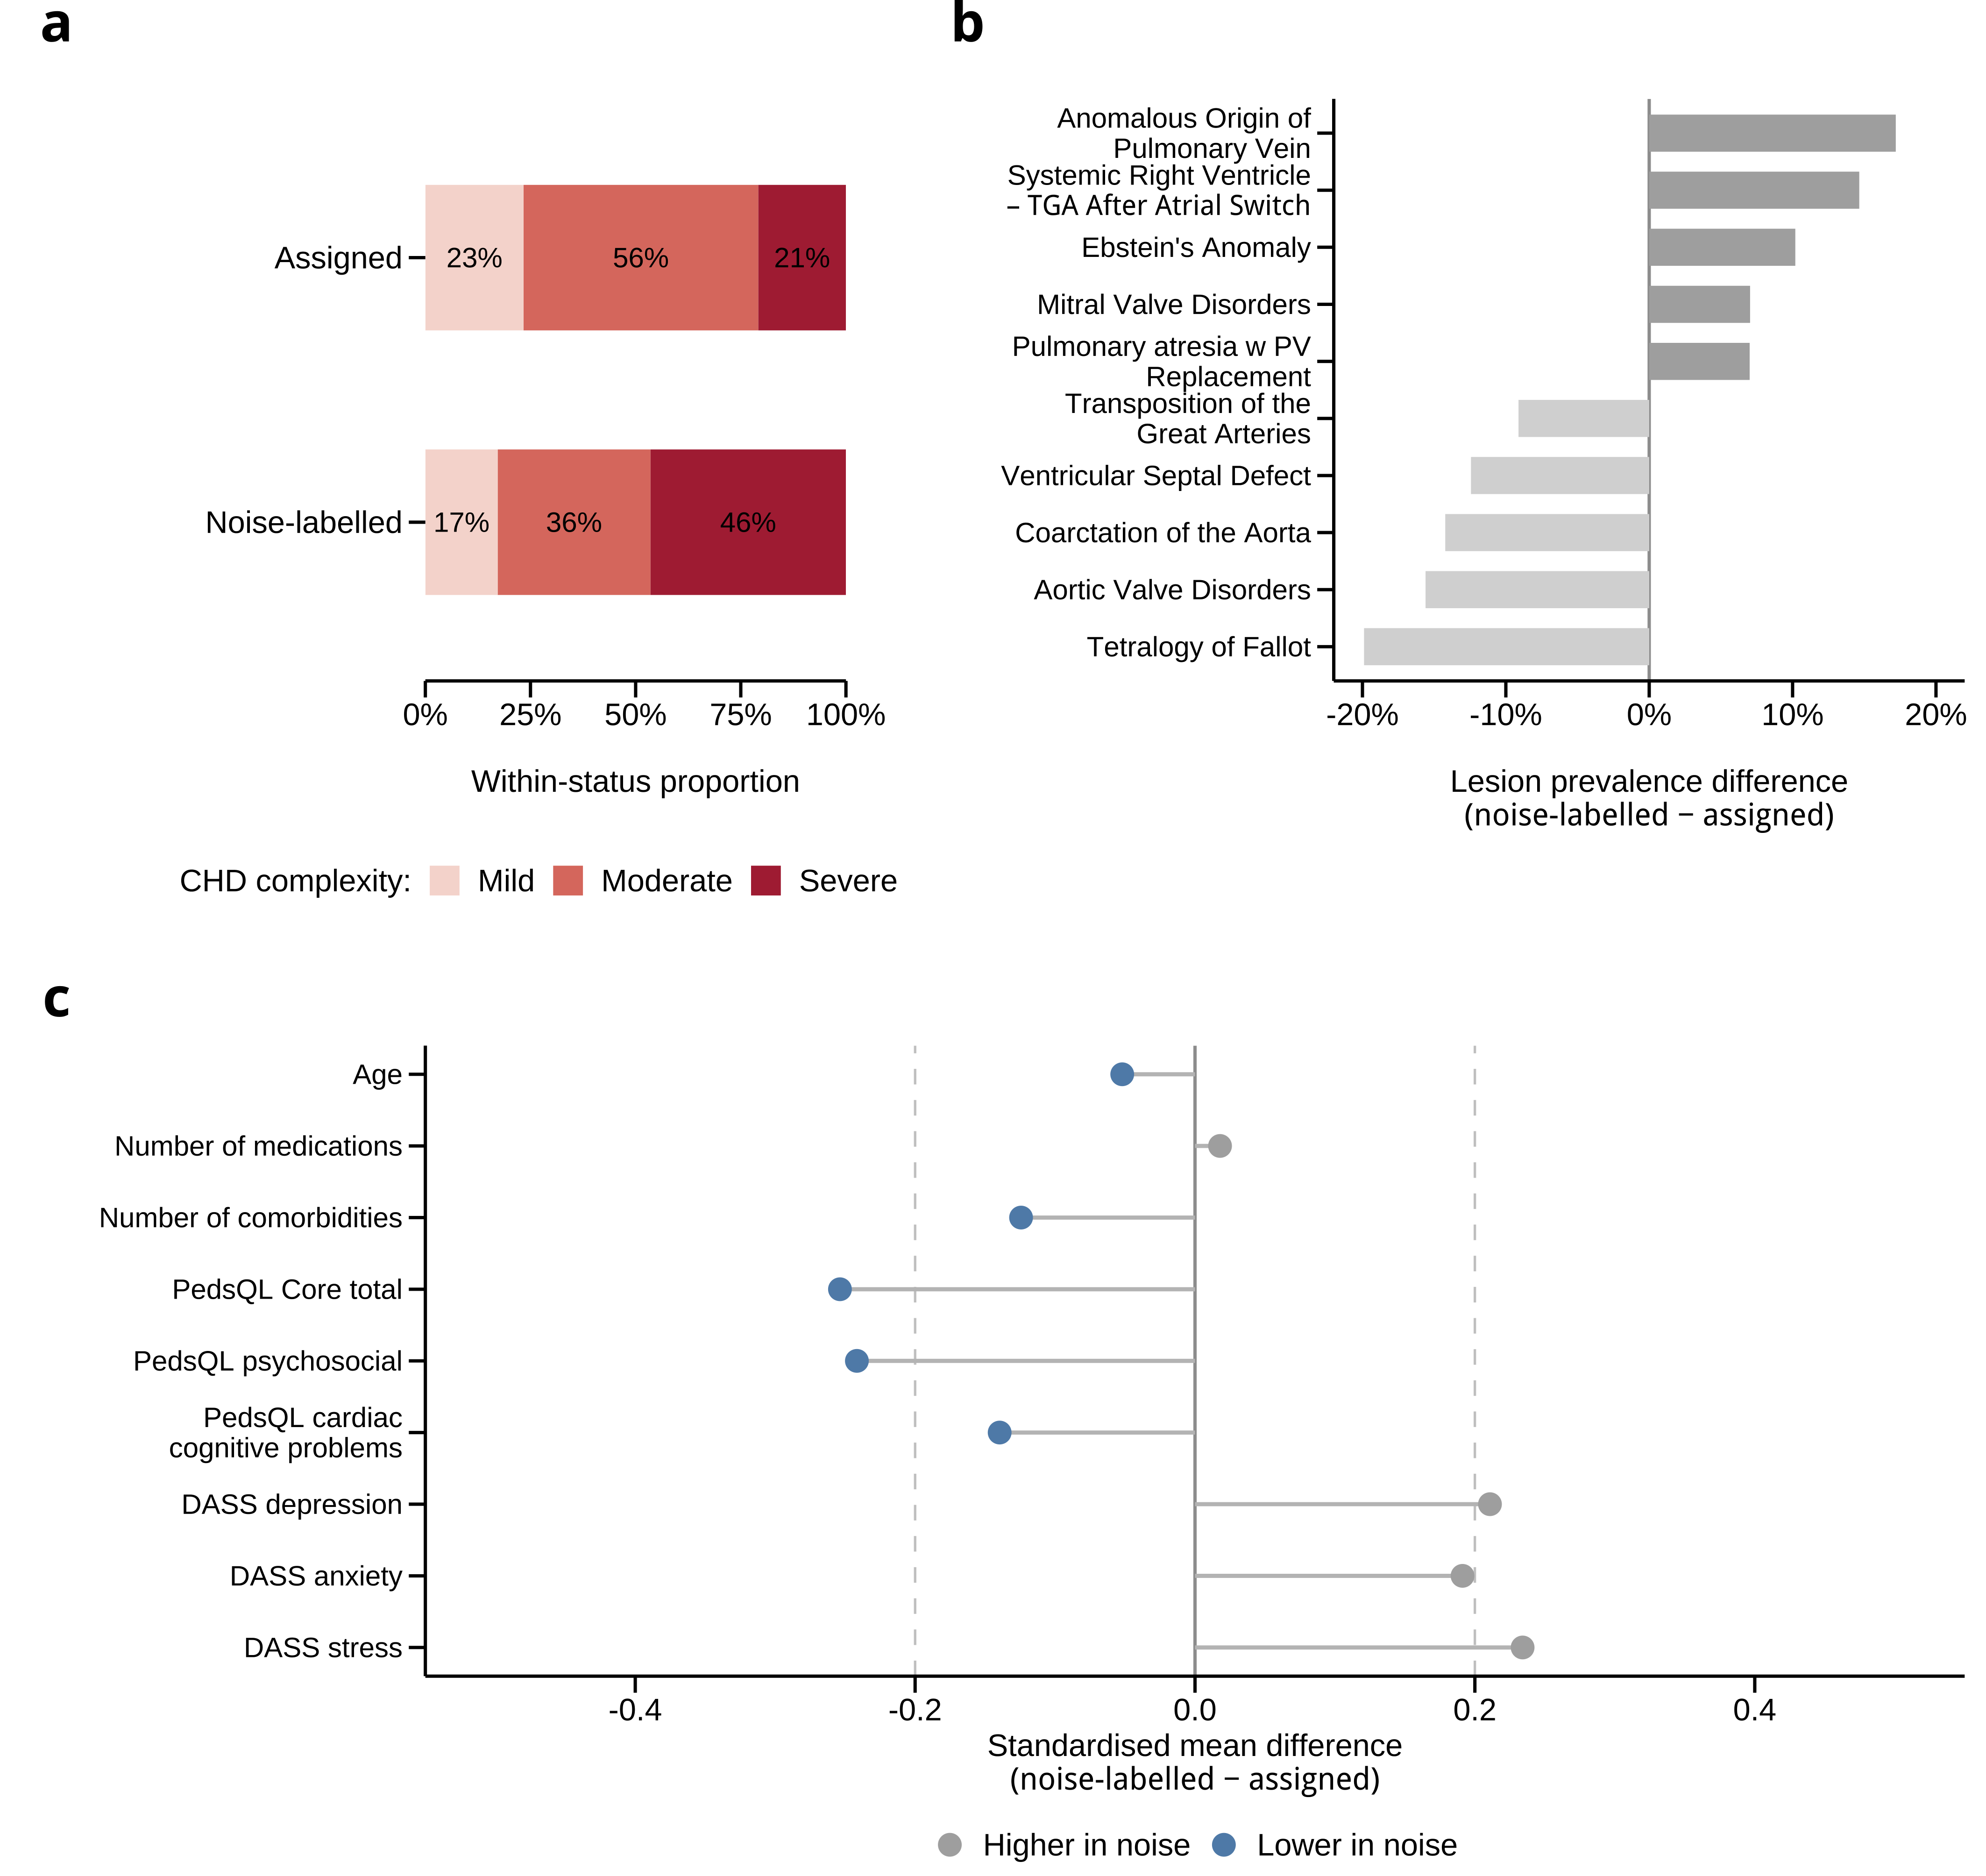


**Supplementary Figure 2. Clinical profile of noise-labelled patients.**
**a,** Distribution of CHD complexity among patients assigned to a primary semantic phenotype versus patients retained as noise by HDBSCAN. Assigned patients were pooled across all six non-noise primary phenotypes. Noise-labelled patients showed a higher proportion of severe CHD complexity than assigned patients, indicating that the noise group was not simply random residual variation. Colours indicate mild, moderate and severe CHD complexity. **b,** Lesion-category enrichment among noise-labelled patients, calculated as the lesion prevalence in noise-labelled patients minus the lesion prevalence in assigned patients. Positive values indicate lesion categories that were more common among noise-labelled patients, whereas negative values indicate lesion categories that were more common among assigned patients. Noise-labelled patients were enriched for several less densely represented or more heterogeneous lesion categories, including anomalous origin of pulmonary vein, systemic right ventricle/TGA after atrial switch, Ebstein’s anomaly, mitral valve disorders and pulmonary atresia with pulmonary valve replacement. **c,** Standardised mean differences comparing noise-labelled versus assigned patients across selected clinical and patient-reported variables. Values are calculated as noise-labelled minus assigned; positive values indicate higher mean values in noise-labelled patients, and negative values indicate lower mean values in noise-labelled patients. Grey points indicate variables higher in noise-labelled patients, while blue points indicate variables lower in noise-labelled patients. Noise-labelled patients showed higher distress scores and lower PedsQL functioning scores, supporting interpretation of the noise group as a clinically meaningful density-unstable subgroup rather than analytic failure.

**Supplementary Tables**

**Supplementary Table 1. Encoder adaptation settings and stability diagnostics.**

| **Item** | **Value** |
| --- | --- |
| **Encoder adaptation** | |
| Base encoder | BAAI/bge-large-en-v1.5 |
| Adapted encoder | BAAI/bge-large-en-v1.5, schema-adapted |
| Adaptation summaries | 1,121 deterministic ACHD summaries |
| Train / validation / test split | 784 / 168 / 169 |
| Training configuration | 1 epoch; batch size 32; learning rate 5 × 10-6; warm-up 0.05; max length 384; 1 augmented view per record; 6 anchor repeats; final encoder layer unfrozen |
| Training objective | Positive-pair cosine loss + MSE anchoring to frozen base embeddings |
| **Parameter-change diagnostics** | |
| Largest relative L2 parameter change | ≈ 0.000888 (encoder layer 23) |
| Relative L2 change in most other encoder layers | ≈ 0.000016–0.000020 |
| **Embedding preservation** | |
| Base-adapted cosine similarity | Mean 0.998942; SD 0.000060; minimum 0.998828; 1st percentile 0.998842 |
| **Pairwise geometry preservation** | |
| Pairwise comparisons | 14,196 held-out canonical pairs |
| Base-vs-adapted pairwise similarity correlation | Pearson r = 0.999920; Spearman ρ = 0.999863 across 14,196 held-out canonical pairs |
| **Same-vs-different discrimination** | |
| AUROC stability | Base 0.99352; adapted 0.99366; ΔAUROC +0.00014, 95% CI, -0.00018 to +0.00054 |
| **Nearest-neighbour preservation** | |
| Top-k neighbour overlap | Mean overlap 99.05–99.35%; median overlap 100% for k = 5, 10, 25 and 50 |
| **λ = 0.70 clustering stability** | |
| Phenotype solution | Base: 6 clusters, 726/155 clustered/noise; adapted: 6 clusters, 724/157 clustered/noise |
| Lesion coherence | Weighted dominant lesion share: base = 0.8209, adapted = 0.8218; adapted diagnosis fragmentation 0.000 |
| Base-vs-adapted agreement | ARI 0.995; NMI 0.994; common non-noise ARI/NMI 1.000/1.000 |
| ACHD, adult congenital heart disease; ARI, adjusted Rand index; AUROC, area under the receiver-operating-characteristic curve; NMI, normalised mutual information; SD, standard deviation. Δ values are calculated as adapted minus base. Weighted dominant lesion share operationalised lesion coherence. | |

**Supplementary Table 2. Held-out validation variables used in Figure 6.**

| **Characteristic** | **Overall cohort** |
| --- | --- |
| **Continuous held-out validators** | |
| Cardiac Anxiety Questionnaire score | 22.0 [15.0, 30.0]; n = 879 |
| Connor-Davidson Resilience Scale score | 29.0 [23.0, 34.0]; n = 872 |
| Impact of Event Scale-Revised score | 0.1 [0.0, 0.5]; n = 878 |
| PROMIS Sleep Disturbance T-score | 50.2 [43.9, 55.3]; n = 875 |
| 6-minute walk distance | 557.0 [486.0, 621.0]; n = 547 |
| **Binary held-out clinical/burden validators** | |
| NYHA class II–IV | 549/846 (64.9%) |
| Employment impact | 192/852 (22.5%) |
| Employment changes | 232/834 (27.8%) |
| Education impact | 161/879 (18.3%) |
| Education changed | 184/879 (20.9%) |
| Learning difficulties | 263/879 (29.9%) |
| Fell behind in education | 305/878 (34.7%) |
| Assessment difficulties | 123/878 (14.0%) |
| Social involvement difficulties | 296/878 (33.7%) |
| ED use burden | 215/866 (24.8%) |
| Multiple specialist doctors | 259/869 (29.8%) |
| Values are median [IQR]; n, or n/N (%). These variables were held out from clinical-summary generation, encoder adaptation, λ selection, primary clustering, burden-axis construction and subphenotype assignment, and were used only for downstream validation in Figure 6. CAQ, Cardiac Anxiety Questionnaire; CD-RISC, Connor-Davidson Resilience Scale; ED, emergency department; IES-R, Impact of Event Scale-Revised; IQR, interquartile range; NYHA, New York Heart Association; PROMIS, Patient-Reported Outcomes Measurement Information System | |

**Supplementary Table 3. λ-sweep sensitivity for primary phenotype discovery.**

| **λ** | **Primary phenotypes** | **Assigned / noise-labelled patients** | **Lesion coherence** | **Diagnosis fragmentation** |
| --- | --- | --- | --- | --- |
| 0.00 | 8 | 612 / 269 (30.5% noise) | 0.868 | 0.350 |
| 0.10 | 8 | 612 / 269 (30.5% noise) | 0.866 | 0.348 |
| 0.20 | 8 | 607 / 274 (31.1% noise) | 0.867 | 0.344 |
| 0.30 | 8 | 598 / 283 (32.1% noise) | 0.863 | 0.333 |
| 0.40 | 7 | 706 / 175 (19.9% noise) | 0.793 | 0.144 |
| 0.50 | 7 | 699 / 182 (20.7% noise) | 0.794 | 0.139 |
| 0.60 | 7 | 688 / 193 (21.9% noise) | 0.799 | 0.137 |
| 0.70 | 6 | 724 / 157 (17.8% noise) | 0.822 | 0.000 |
| 0.80 | 6 | 669 / 212 (24.1% noise) | 0.855 | 0.000 |
| 0.90 | 6 | 442 / 439 (49.8% noise) | 0.939 | 0.000 |
| 1.00 | 3 | 364 / 517 (58.7% noise) | 0.179 | 1.544 |
| λ denotes the weighting of patient-reported outcome content in the semantic representation. The selected operating point was λ = 0.70. Assigned patients are those allocated to a primary HDBSCAN phenotype; noise-labelled patients were retained as density-unstable observations. Lesion coherence is reported as the weighted dominant lesion share. Diagnosis fragmentation quantifies whether the same lesion category was split across multiple dominant primary phenotypes. | | | | |

**Supplementary Table 4. Full held-out validation model estimates for Figure 6.**

**Supplementary Table 4a. Continuous held-out validation model estimates.**

| **Outcome** | **n** | **ΔSD [95% CI]** | **p value** | **Adj. R² A / A+S** |
| --- | --- | --- | --- | --- |
| Cardiac anxiety | 722 | 0.96 [0.83, 1.08] | <0.001 | 0.072 / 0.296 |
| Resilience | 717 | −0.87 [−1.01, −0.74] | <0.001 | 0.033 / 0.222 |
| Trauma symptoms | 721 | 0.72 [0.58, 0.85] | <0.001 | 0.022 / 0.147 |
| Sleep disturbance | 719 | 0.68 [0.54, 0.82] | <0.001 | 0.016 / 0.131 |
| 6-minute walk distance | 459 | −0.48 [−0.65, −0.30] | <0.001 | 0.080 / 0.133 |

**Supplementary Table 4b. Binary held-out validation model estimates.**

| **Outcome** | **n** | **Lower %** | **Higher %** | **RD, pp [95% CI]** | **AUC A / A+S** |
| --- | --- | --- | --- | --- | --- |
| NYHA class II-IV | 695 | 45.7 | 81.1 | 35.3 [28.3, 41.0] | 0.735 / 0.822 |
| Employment impact | 701 | 6.7 | 36.5 | 29.8 [24.6, 35.4] | 0.667 / 0.800 |
| Employment changes | 686 | 14.1 | 37.5 | 23.5 [16.8, 29.6] | 0.671 / 0.746 |
| Fell behind in education | 721 | 18.4 | 51.0 | 32.6 [25.4, 38.8] | 0.616 / 0.739 |
| Learning difficulties | 722 | 16.0 | 43.0 | 27.0 [20.4, 32.9] | 0.638 / 0.734 |
| Education impact | 722 | 7.9 | 28.0 | 20.1 [14.9, 25.7] | 0.655 / 0.751 |
| Education changed | 722 | 10.9 | 29.1 | 18.2 [12.8, 23.7] | 0.669 / 0.730 |
| Assessment difficulties | 722 | 7.5 | 20.3 | 12.7 [8.2, 17.9] | 0.743 / 0.787 |
| Social involvement difficulties | 721 | 17.2 | 47.0 | 29.8 [23.6, 35.5] | 0.665 / 0.752 |
| ED use burden | 714 | 20.6 | 29.3 | 8.7 [2.6, 14.9] | 0.596 / 0.612 |
| Multiple specialist doctors | 713 | 24.5 | 34.7 | 10.2 [3.8, 16.6] | 0.623 / 0.642 |
| ΔSD denotes the adjusted higher- versus lower-burden subphenotype difference in standard deviation units. Lower % and Higher % denote adjusted probabilities expressed as percentages. RD, pp denotes the marginal standardised risk difference expressed in percentage points, with simulation-based 95% confidence intervals; p-values were not separately reported for binary outcomes. Models were adjusted for age, sex, remoteness, CHD complexity and primary phenotype cluster. A denotes anatomy-based model; A+S denotes anatomy plus subphenotype model. Adj. R², adjusted coefficient of determination; AUC, area under the receiver-operating-characteristic curve; CHD, congenital heart disease; ED, emergency department; NYHA, New York Heart Association; RD, risk difference. | | | | | |
